# Supplementary material
Source: Research Square preprint supplement (doi:10.21203/rs.3.rs-9701606/v1)
Supplement: Supplementary file 1 [file 046b346b32c7e9d2ed425d75.docx]

**Clinical Study Protocol**

**Ultrasound-targeted Microbubble Destruction Combined with Chemoimmunotherapy in Locally Advanced MSS/pMMR Rectal Cancer (UNIC)**

*An exploratory, single-centre, open-label phase 2 clinical study*

English submission version: 1.1

Original protocol version/date: V1.0 / 1 December 2023

English aligned version date: 10 May 2026

Sponsor/Investigator-initiated study: The First Affiliated Hospital of Zhengzhou University

Principal investigator: Zhenqiang Sun

**Confidential**

# Protocol Synopsis

| **Study title** | Ultrasound-targeted microbubble destruction combined with chemoimmunotherapy in locally advanced MSS/pMMR rectal cancer (UNIC): an exploratory phase 2 study |
| --- | --- |
| **Study acronym** | UNIC |
| **Study design** | Single-centre, open-label, exploratory phase 2 clinical study |
| **Study population** | Previously untreated patients with locally advanced MSS/pMMR rectal adenocarcinoma |
| **Planned sample size** | Up to 40 patients in the parent study; the current manuscript reports a preliminary analysis at the data cutoff. |
| **Treatment regimen** | UTMD on Days 1–3 of each 21-day cycle plus CAPOX chemotherapy and PD-1 inhibition. Sintilimab 200 mg IV and oxaliplatin 130 mg/m² IV are administered on Day 2; capecitabine 1000 mg/m² orally twice daily is administered on Days 2–15. |
| **Treatment duration** | Individualised according to tumour response assessed by real-time ultrasound, with a maximum of eight neoadjuvant cycles. |
| **Surgery** | Radical rectal cancer surgery is scheduled within 1 week after preoperative imaging when the individualised neoadjuvant stopping criterion is met or maximum treatment duration is completed. |
| **Postoperative treatment** | When indicated, postoperative adjuvant CAPOX is administered to complete a total of eight cycles of oxaliplatin-based chemotherapy, including neoadjuvant CAPOX cycles. UTMD and PD-1 inhibition are not continued after surgery. |
| **Primary endpoint** | Pathological complete response (pCR), defined as absence of viable tumour cells in the resected primary tumour and all regional lymph nodes (ypT0N0). |
| **Key secondary endpoints** | ORR, DCR, R0 resection rate, sphincter preservation rate, DFS, OS, safety, and patient-reported outcomes. |
| **Patient-reported outcomes** | LARS score for bowel function after stoma reversal and restoration of transanal defecation; IPSS for urinary symptoms; EQ-5D-5L with EQ VAS reported for quality of life. |
| **Safety grading** | Adverse events graded according to NCI CTCAE version 5.0; surgical complications summarised according to Clavien–Dindo classification where applicable. |
| **Imaging assessments** | Baseline high-resolution pelvic MRI and chest/abdominal CT; treatment response assessment every four cycles using abdominal/pelvic contrast-enhanced CT and pelvic MRI, with real-time ultrasound assessment before each UTMD session. |
| **Follow-up** | Every 3 months for the first 2 years after surgery/adjuvant treatment, then every 6 months thereafter; colonoscopy within 1 year after surgery, or 3–6 months if preoperative colonoscopy was incomplete. |
| **Data cutoff for preliminary report** | 31 March 2026 |
| **Trial registration** | Chinese Clinical Trial Registry, ChiCTR2400090149 |
| **Ethics approval** | Ethics Committee of the First Affiliated Hospital of Zhengzhou University, approval numbers S2024-K011-001 and S2024-K011-002 |

# 1. Background and Rationale

Locally advanced rectal cancer (LARC) is currently managed with multimodality treatment. Radiotherapy-based neoadjuvant regimens remain a central component of standard care, but pelvic irradiation can be associated with acute and long-term toxicity, including radiation-related enteritis or proctitis, pelvic tissue oedema or fibrosis, impaired bowel, urinary, and sexual function, and reduced quality of life.

Most rectal cancers are microsatellite stable or mismatch repair proficient (MSS/pMMR), a population that generally derives limited benefit from immune checkpoint inhibitor monotherapy. Recent radiotherapy-based combinations of chemotherapy and immunotherapy have shown improved response rates in selected settings, but these approaches retain the intrinsic burden of pelvic irradiation.

Ultrasound-targeted microbubble destruction (UTMD) is a physical therapeutic approach that uses low-frequency, high-mechanical-index ultrasound to induce microbubble oscillation and cavitation. These mechanical effects may increase vascular permeability, enhance local drug distribution, and modulate the tumour microenvironment while avoiding ionising radiation. Preclinical evidence suggests that UTMD may enhance systemic antitumour therapies, but its clinical evaluation in gastrointestinal malignancies remains limited.

The UNIC study was designed to evaluate whether UTMD integrated with CAPOX chemotherapy and PD-1 inhibition can provide preliminary antitumour activity with acceptable safety in previously untreated patients with locally advanced MSS/pMMR rectal cancer.

# 2. Objectives and Endpoints

## 2.1 Primary objective

To evaluate the pCR rate after neoadjuvant treatment with UTMD combined with CAPOX chemotherapy and PD-1 inhibition in patients with locally advanced MSS/pMMR rectal cancer.

## 2.2 Secondary objectives

- To evaluate ORR and DCR according to RECIST version 1.1.
- To evaluate R0 resection rate and sphincter preservation rate.
- To evaluate DFS and OS.
- To assess safety and tolerability, including treatment-related adverse events and procedure-related events.
- To assess patient-reported outcomes, including bowel function, urinary symptoms, and quality of life.
- To explore translational biomarkers, including circulating or tissue immune cell subsets, where available.

## 2.3 Endpoint definitions

| **pCR** | Absence of viable tumour cells in the primary tumour and all regional lymph nodes after radical surgery (ypT0N0). |
| --- | --- |
| **ORR** | Proportion of patients with complete response or partial response according to RECIST 1.1. Responses should be confirmed by repeat imaging at least 4 weeks after initial documentation when feasible. |
| **DCR** | Proportion of patients with complete response, partial response, or stable disease lasting at least 6 weeks. |
| **R0 resection rate** | Proportion of operated patients with microscopically negative surgical margins. |
| **Sphincter preservation rate** | Proportion of operated patients undergoing sphincter-preserving surgery without permanent colostomy. |
| **DFS** | Time from surgery to local recurrence, distant metastasis, or death from any cause. |
| **OS** | Time from first study treatment to death from any cause. |
| **Patient-reported outcomes** | LARS score after stoma reversal and restoration of transanal defecation; IPSS for urinary symptoms; EQ-5D-5L and EQ VAS for quality of life. |

# 3. Study Design

UNIC is an investigator-initiated, single-centre, open-label, exploratory phase 2 study. Eligible patients receive neoadjuvant UTMD combined with CAPOX chemotherapy and PD-1 inhibition. The neoadjuvant treatment duration is individualised on the basis of real-time ultrasound assessment of tumour response, with a maximum duration of eight cycles. Patients proceed to preoperative imaging evaluation and radical surgery when the individualised stopping criterion is met or after completing the maximum number of cycles.

# 4. Study Population

## 4.1 Inclusion criteria

1. Age 18–75 years.
2. Histologically confirmed rectal adenocarcinoma.
3. Locally advanced disease defined as cT3–4N0M0 or T1–4N+M0 by high-resolution pelvic MRI, with no distant metastasis on chest/abdominal CT or other clinically indicated imaging.
4. MSS or pMMR status confirmed by MSI testing and/or immunohistochemistry for mismatch repair proteins.
5. ECOG performance status of 0 or 1.
6. Tumour located within 10 cm from the anal verge.
7. Adequate major organ function for neoadjuvant treatment, including haematological, hepatic, renal, and coagulation parameters as specified in the study manual.
8. Ability to understand the study, provide written informed consent, and comply with protocol procedures and follow-up.

## 4.2 Key exclusion criteria

1. Failure to meet any inclusion criterion.
2. Clinically significant intestinal obstruction or substantial active bleeding requiring urgent intervention.
3. Known allergy or contraindication to SONAZOID, sintilimab or other PD-1 inhibitor, capecitabine, oxaliplatin, or related compounds.
4. Active autoimmune disease or a history of autoimmune disease requiring systemic treatment, except conditions judged by investigators to be clinically insignificant or controlled.
5. Use of systemic immunosuppressive therapy within 2 weeks before enrolment, except physiological replacement doses.
6. Prior antitumour therapy for rectal cancer, including chemotherapy, radiotherapy, targeted therapy, immunotherapy, or surgery.
7. Uncontrolled cardiovascular disease, severe infection, active hepatitis B or C with clinically significant viral replication, HIV infection, or other serious uncontrolled comorbidity.
8. Pregnancy or breastfeeding.
9. History of another malignancy within 5 years, except adequately treated non-melanoma skin cancer, cervical carcinoma in situ, or other malignancies deemed by investigators to have minimal recurrence risk.
10. Participation in another interventional clinical trial within 4 weeks before enrolment.
11. Any condition that, in the investigator’s judgment, would compromise patient safety or protocol compliance.

# 5. Study Treatment

## 5.1 UTMD procedure

Each treatment cycle consists of three consecutive days of UTMD therapy. For each UTMD session, oxybuprocaine gel is applied to the anal canal, and 100 mL of ultrasound coupling agent is instilled into the rectal lumen through a rectal catheter. The ultrasound probe is inserted transanally and positioned in direct contact with the tumour surface.

SONAZOID (16 μL) is dissolved in 2 mL of saline and administered intravenously in five divided doses at 6-min intervals during the 30-min ultrasound exposure. Low-frequency, high-mechanical-index ultrasound is applied to the tumour site for 30 min using the VINNO ULTIMUS 9E ultrasound system. Real-time ultrasound is used for tumour localisation, monitoring of microbubble cavitation, and assessment of tumour response.

## 5.2 Chemoimmunotherapy schedule

| **Component** | **Timing** | **Dose and route** |
| --- | --- | --- |
| UTMD | Days 1–3 of each cycle | 30 min per session |
| Sintilimab | Day 2 of each cycle | 200 mg IV |
| Oxaliplatin | Day 2 of each cycle | 130 mg/m² IV |
| Capecitabine | Days 2–15 of each 21-day cycle | 1000 mg/m² orally twice daily |

Each treatment cycle is 21 days. After capecitabine administration is completed, patients enter the rest period before the next cycle.

## 5.3 Individualised treatment duration and surgery

The duration of neoadjuvant treatment is individualised according to tumour response assessed by real-time ultrasound. Tumour size is measured before each UTMD session. When tumour response reaches a plateau, defined as no further shrinkage on two consecutive ultrasound assessments, or when the tumour is no longer visible on ultrasound, no additional neoadjuvant cycles are administered and patients proceed to preoperative imaging assessment followed by radical rectal cancer surgery within 1 week. The maximum duration of neoadjuvant treatment is eight cycles.

## 5.4 Postoperative adjuvant therapy

After surgery, adjuvant treatment is determined according to pathological findings and clinical guidelines. When indicated, patients receive CAPOX as adjuvant chemotherapy to complete a total of eight cycles of oxaliplatin-based chemotherapy, including the neoadjuvant CAPOX cycles. UTMD and PD-1 inhibition are not continued after surgery.

# 6. Study Assessments

## 6.1 Baseline assessments

- Written informed consent.
- Demographics, medical history, prior medication history, physical examination, vital signs, ECOG performance status.
- Histological confirmation of rectal adenocarcinoma and MSS/pMMR status by MSI testing and/or mismatch repair protein immunohistochemistry.
- High-resolution pelvic MRI; chest/abdominal CT; colonoscopy if feasible; additional imaging as clinically indicated.
- Laboratory tests, including complete blood count, urine analysis, stool testing where clinically indicated, liver and renal function, electrolytes, coagulation, thyroid function, tumour markers, and infectious disease screening.
- Pregnancy test for women of childbearing potential.
- Quality-of-life assessment using EQ-5D-5L and EQ VAS.

## 6.2 On-treatment assessments

- Before each treatment cycle: physical examination, vital signs, ECOG performance status, laboratory tests, electrocardiogram as clinically indicated, and adverse event assessment.
- Before each UTMD session: real-time ultrasound localisation and tumour size measurement.
- Every four cycles: abdominal/pelvic contrast-enhanced CT and pelvic MRI for treatment response assessment.
- Concomitant medications and adverse events are recorded throughout treatment.

## 6.3 Surgical and pathological assessments

- Preoperative imaging assessment before surgery.
- Surgical procedure and intraoperative findings, including bowel wall or perirectal oedema, pelvic anatomical planes, autonomic nerve preservation, and sphincter preservation.
- Pathological assessment of resected primary tumour and regional lymph nodes by two experienced pathologists.
- Tumour regression grading using modified Ryan criteria.
- Postoperative complications within 30 days, graded using Clavien–Dindo classification.

## 6.4 Follow-up assessments

- Postoperative follow-up every 3 months for the first 2 years and every 6 months thereafter.
- Follow-up assessments include chest/abdominal CT, tumour markers, and routine laboratory tests including complete blood count and liver function.
- Colonoscopy within 1 year after surgery; if preoperative colonoscopy was incomplete because of tumour obstruction, colonoscopy should be performed 3–6 months after surgery. Subsequent colonoscopy is planned every 5 years if no colorectal lesions are detected, or earlier according to endoscopic and pathological findings.
- IPSS questionnaire during follow-up for urinary symptoms.
- LARS score only after stoma reversal and restoration of transanal defecation.

# 7. Safety Evaluation and Management

Safety is assessed in all patients who receive at least one component of study treatment. Adverse events are collected from the time of informed consent until at least 30 days after the last study treatment, and longer when clinically indicated. Adverse events are graded according to NCI CTCAE version 5.0. The relationship between an adverse event and study treatment is assessed by the investigator as definite, probable, possible, unlikely, or unrelated.

## 7.1 Dose interruption, reduction, and discontinuation

- Capecitabine and oxaliplatin may be interrupted, reduced, or discontinued according to toxicity severity and investigator judgment.
- The dose of sintilimab is not reduced. Sintilimab may be withheld or permanently discontinued according to standard immune-related adverse event management principles.
- If an adverse event does not improve to grade 0–1 or baseline after dose modification and appropriate management, permanent discontinuation of the relevant treatment component should be considered.
- Patients may withdraw consent at any time. The investigator may discontinue study treatment if continuing treatment is judged not to benefit the patient or to pose excessive risk.

## 7.2 Serious adverse events

Serious adverse events include events that result in death, are life-threatening, require hospitalisation or prolongation of hospitalisation, result in persistent or substantial disability, congenital anomaly, or other important medical events. Serious adverse events are reported to the principal investigator and ethics committee according to institutional requirements and applicable regulations.

# 8. Statistical Analysis Plan

This is an exploratory, single-centre phase 2 study designed to provide a preliminary assessment of antitumour activity and safety. The parent study plans to enrol up to 40 patients. The current manuscript reports a preliminary analysis at the prespecified data cutoff; all analyses for this preliminary report are descriptive.

## 8.1 Analysis populations

| **Safety analysis set** | All enrolled patients who receive at least one component of study treatment. |
| --- | --- |
| **Per-protocol efficacy analysis set** | Patients who complete neoadjuvant treatment and undergo definitive surgery; used for primary pCR reporting in the preliminary manuscript. |
| **Imaging-evaluable set** | Patients with complete baseline assessment and at least one post-treatment imaging assessment; used for ORR and DCR. |
| **Full analysis set** | All patients who receive at least one component of study treatment; used for supportive or intention-to-treat summaries where appropriate. |

## 8.2 Statistical methods

- Continuous variables are summarised as median (range) unless otherwise specified.
- Categorical variables are summarised as frequency and percentage. Percentages might not sum to 100% because of rounding.
- Binary endpoints, including pCR, ORR, DCR, R0 resection rate, and sphincter preservation rate, are reported as percentages.
- For the preliminary analysis, confidence intervals and formal hypothesis testing are not calculated because of the limited sample size and immature follow-up.
- DFS and OS are planned to be estimated using the Kaplan–Meier method when follow-up becomes mature. For early preliminary reports, only event counts and median follow-up are summarised.
- Adverse events, laboratory data, and vital signs are summarised descriptively.

# 9. Data Management and Quality Assurance

Case report forms are completed by authorised study personnel using source documents. Data entry and verification are performed according to institutional standard operating procedures. Data queries are resolved by investigators and data managers before database lock. Source records are retained in accordance with institutional and regulatory requirements.

The study team is trained in the protocol, Good Clinical Practice, study procedures, adverse event reporting, and data documentation. Monitoring is conducted to ensure protocol compliance, data accuracy, and participant safety.

# 10. Ethical and Regulatory Considerations

This study is conducted in accordance with the Declaration of Helsinki, Good Clinical Practice guidelines, and applicable laws and regulations. The protocol and informed consent form were approved by the Ethics Committee of the First Affiliated Hospital of Zhengzhou University. Written informed consent is obtained from all participants before any study-specific procedure.

Confidentiality of participant data is maintained. Personally identifiable information is accessible only to authorised study personnel and regulatory or ethics bodies as required. Study documents are retained according to institutional policy and applicable regulations.

# Appendix 1. ECOG Performance Status

| **0** | Fully active; able to carry on all pre-disease performance without restriction. |
| --- | --- |
| **1** | Restricted in physically strenuous activity but ambulatory and able to carry out light work. |
| **2** | Ambulatory and capable of all self-care but unable to carry out work activities; up and about more than 50% of waking hours. |
| **3** | Capable of only limited self-care; confined to bed or chair more than 50% of waking hours. |
| **4** | Completely disabled; totally confined to bed or chair. |

# Appendix 2. Patient-reported outcome instruments

- EQ-5D-5L is used to assess quality of life. The EQ VAS is reported as the main quality-of-life score in the manuscript.
- IPSS is used to quantify the burden of lower urinary tract symptoms during follow-up.
- LARS score is used to assess bowel dysfunction after low anterior resection only in patients who have undergone stoma reversal and restored transanal defecation.
